# Supplementary material for: PD-1 engineered cytomembrane cloaked molybdenum nitride for synergistic photothermal and enhanced immunotherapy of breast cancer
Source: Royal Society of Chemistry journal article supplement (doi:10.1039/d2tb01710e), 2022-01-01
Supplement: d2tb01710e1.pdf [file d2tb01710e1.pdf]

## Supporting Information

### **PD-1 Engineered Cytomembrane Cloaked Molybdenum Nitride for Synergistic Photothermal and Enhanced Immunotherapy of Breast Cancer**

*Lian Zhu<sup>a</sup>, Jia-Lin Liu<sup>a</sup>, Jiang-Tao Yang<sup>b</sup>, Ding-Wei Wu<sup>b</sup>, Na Xu<sup>b\*</sup>, Kai-Fu Huo<sup>c\*</sup>, Hai-Bo Wang<sup>a\*</sup>*

## **Appendix:**

**Figure S1** Biocompatibility of synthesized MoN nanomaterials.

**Figure S2** Characterization of PD-1 expression level

**Figure S3** Quantitative statistics of PD-1 expression level

**Figure S4** Temperature induced PD-L1 expression in vivo

**Figure S5** Quantitative statistics of HSP 70 expression level

**Figure S6** Quantitative statistics of cell viability

**Figure S7** Flow cytometry analysis of cell apoptosis

**Figure S8** HE data of different organs

**Figure S9** DCs maturation analysis via flow cytometry

**Figure S10** CD8<sup>+</sup> T cells activation level analysis via flow cytometry

**Figure S11** Fluorescence images confirmation of the CD8<sup>+</sup> T

**Table 1** Biochemistry indexes of mouse in different groups

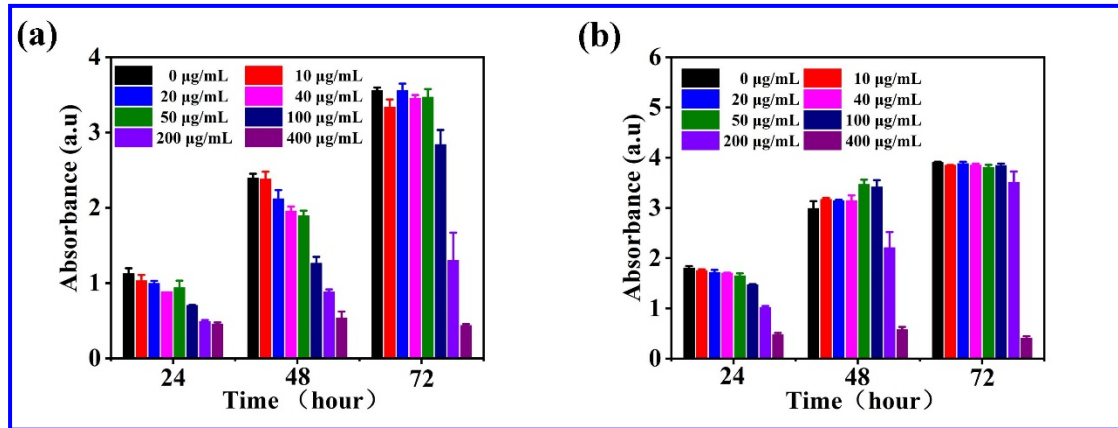

**Fig. S1.** CCK-8 assay determination of the biocompatibility of synthesized MoN nanomaterials. (a, b) respectively referred to NIH 3T3 and HUVEC cells.

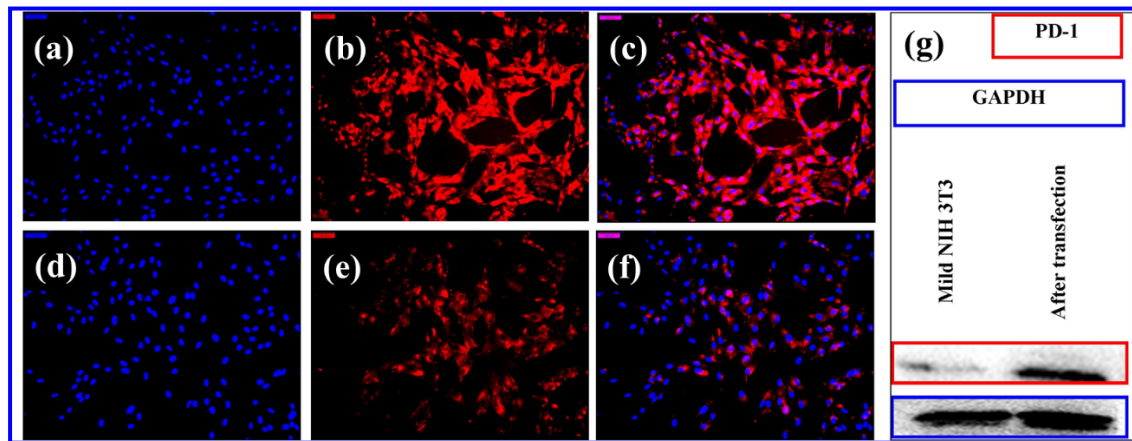

**Fig. S2.** Characterization of PD-1 protein expression level. (a-c) Fluorescence images of the transfected NIH 3T3 cells. (d-f) Fluorescence images of the mild NIH 3T3 cells. (g) PD-1 protein characterization via western blot. Scale bars in Fig S2a-f refer to 50 µm.

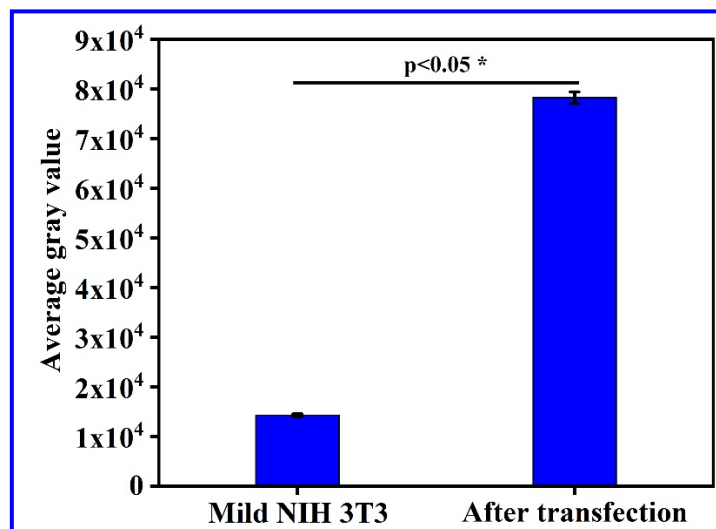

**Fig. S3.** Quantitative statistics of western blot results, average gray value of PD-1 expression level of NIH 3T3 cells before and after transfection.

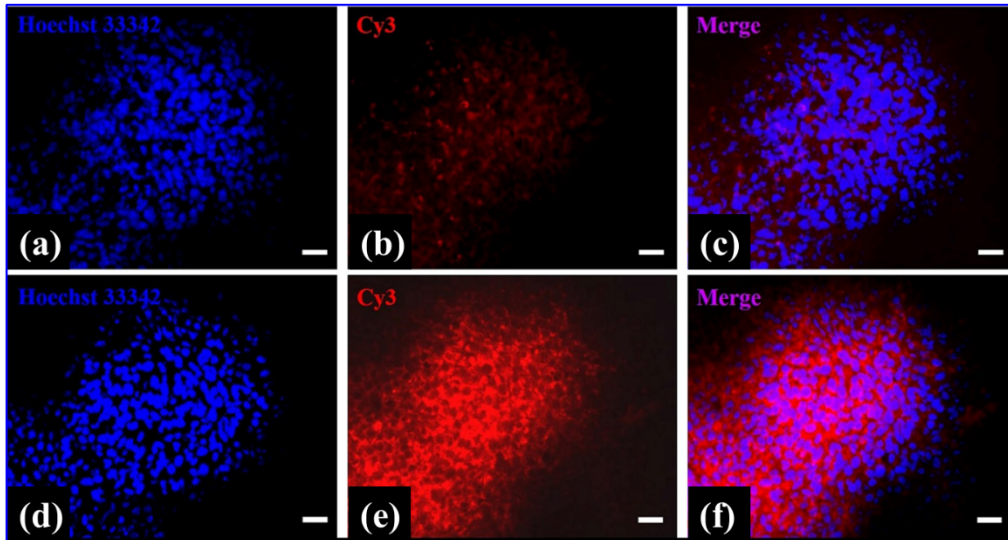

**Fig. S4.** Fluorescence images of PD-L1 protein expression in vivo research. (a-c) Fluorescence images of PD-L1 in the blank group. (d-f) Fluorescence images of PD-L1 in the MoN@Me&PD-1 group.

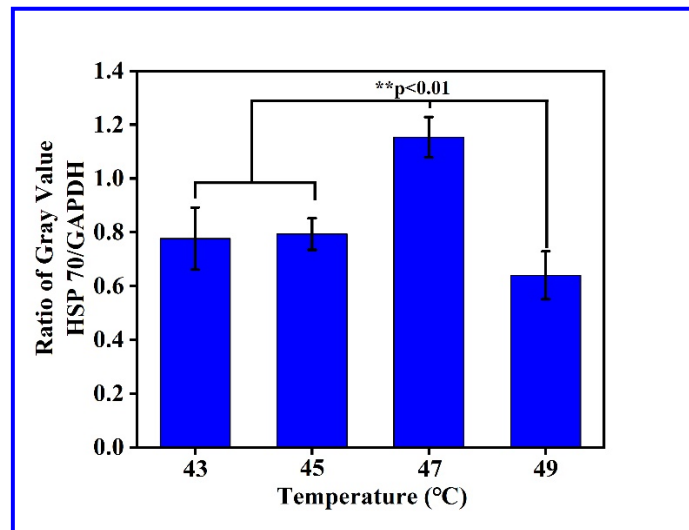

**Fig. S5.** Quantitative statistics of HSP 70 expression level under different temperature

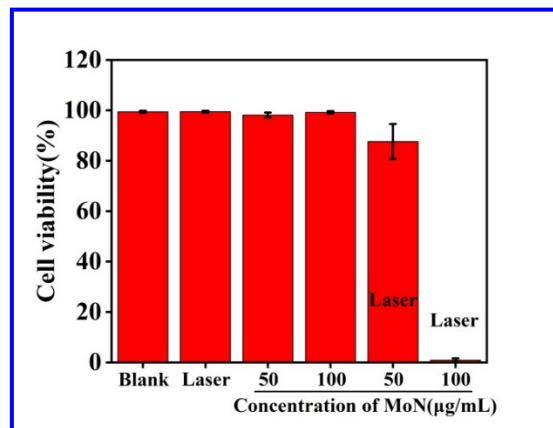

**Fig. S6.** Quantitative statistics of 4T1 cell viability after phototherapy..

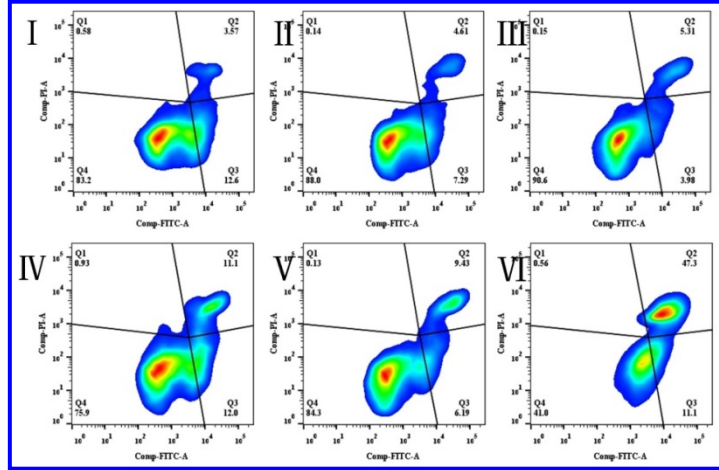

**Fig. S7.** Flow cytometry characterization of the apoptosis of 4T1 cell after phototherapy.

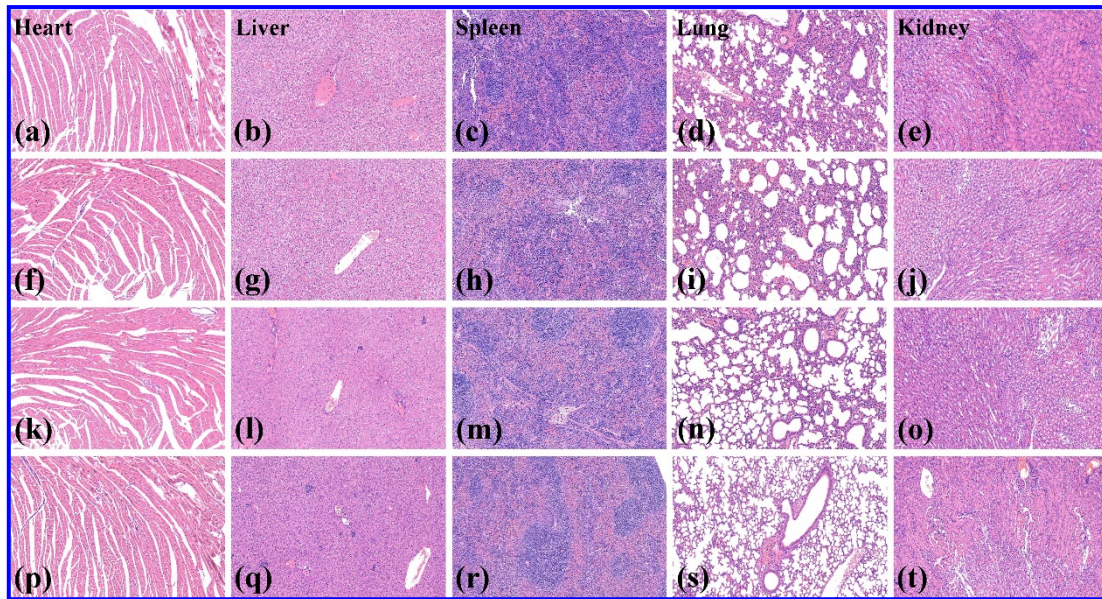

**Fig. S8.** Characterization the biocompatibility of different therapeutic agents. (a-e) HE staining of heart, liver, spleen, lung and kidney of the blank group. (f-j) HE staining of heart, liver, spleen, lung and kidney of the laser group. (k-o) HE staining of heart, liver, spleen, lung and kidney of the MoN@Me group. (p-t) HE staining of heart, liver, spleen, lung and kidney of the MoN@Me&PD-1 group.

**Table S1.** Determination of biochemistry indexes of mouse among different groups.

| Group       | CR<br>(mmol/L)    | ALT(U/L)          | AST(U/L)          | UA( $\mu$ mol/L)  | CK(U/L)            | UREA<br>(mmol/L)  | Tbil<br>( $\mu$ mol/L) |
|-------------|-------------------|-------------------|-------------------|-------------------|--------------------|-------------------|------------------------|
| Blank       | 8.04 $\pm$ 0.45   | 110.29 $\pm$ 0.83 | 313.60 $\pm$ 0.12 | 91.04 $\pm$ 1.70  | 1221.59 $\pm$ 8.72 | 15.64 $\pm$ 0.028 | 4.84 $\pm$ 0.27        |
| Laser       | 13.45 $\pm$ 0.21  | 159.92 $\pm$ 2.48 | 446.60 $\pm$ 2.70 | 123.95 $\pm$ 1.36 | 1025.12 $\pm$ 0.97 | 22.70 $\pm$ 0.67  | 11.78 $\pm$ 0.23       |
| MoN@Me      | 10.24 $\pm$ 0.02  | 42.52 $\pm$ 1.28  | 206.87 $\pm$ 1.24 | 62.77 $\pm$ 7.24  | 801.68 $\pm$ 2.10  | 14.02 $\pm$ 0.46  | 4.15 $\pm$ 0.057       |
| MoN@Me&PD-1 | 17.426 $\pm$ 0.03 | 96.58 $\pm$ 2.36  | 169.50 $\pm$ 1.18 | 53.33 $\pm$ 1.36  | 1134.59 $\pm$ 8.42 | 11.55 $\pm$ 0.77  | 5.78 $\pm$ 0.076       |

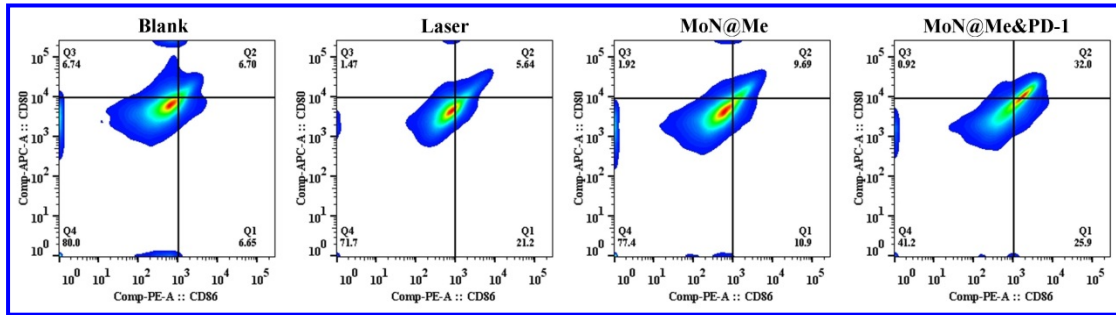

Fig. S9. Detection of DCs maturation via flow cytometry.

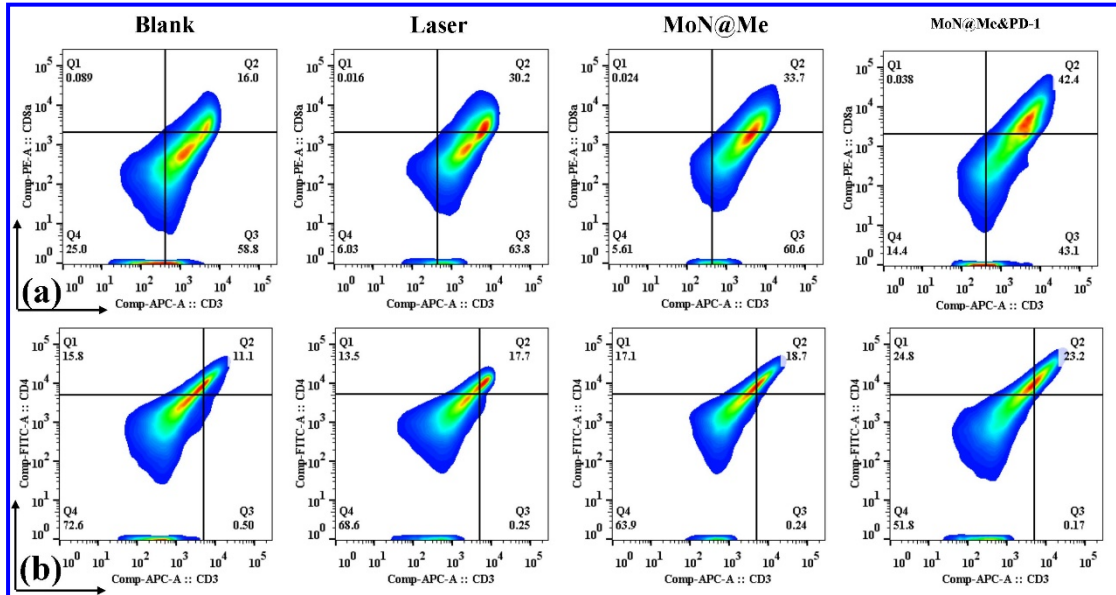

Fig. S10. a, b) T cells activation ratio among different groups.

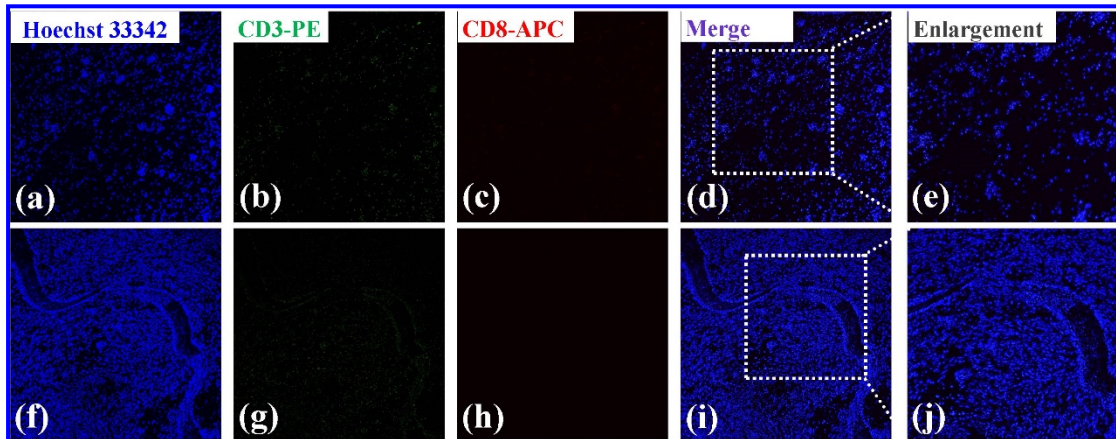

Fig. S11. Fluorescence images confirmation of the CD8+ T cells infiltrating into the tumor tissues among the laser and MoN@Me group.
